# Supplementary material for: Decreased Triacylglycerol Content and Elevated Contents of Cell Membrane Lipids in Colorectal Cancer Tissue: A Lipidomic Study
Source: PubMed Central journal article supplement (PMC7230725; doi:10.3390/jcm9041095), 2020-04-12
Supplement: jcm-09-01095-s001.pdf [file jcm-09-01095-s001.pdf]

**Table 1.** Primer sequence for RT-PCR. ACTB – beta-actin, HMGCR - HMG-CoA reductase, CPT1a - carnitine palmitoyltransferase I, CHKA - choline kinase alpha, CHKB - choline kinase beta, PCYT1A- choline-phosphate cytidylyltransferase A, CHPT1 - cholinephosphotransferase 1, PISD - phosphatidylserine decarboxylase, SMS1 - sphingomyelin synthase 1, SMS2- sphingomyelin synthase 2.

| <b>Gene name</b> | <b>Forward sequence (from 5` to 3`)</b> | <b>Reverse sequence (from 5` to 3`)</b> |
|------------------|-----------------------------------------|-----------------------------------------|
| ACTB             | AGCACAGAGCCTCGCCTT                      | CATCATCCATGGTGAGCTGG                    |
| CPT1a            | ATCAATCGGACTCTGGAAACGG                  | TCAGGGAGTAGCGCATGGT                     |
| HMGCR            | TACCATGTCAGGGGTAC                       | CAAGCCTAGAGACATAAT                      |
| CHKA             | CGGAAGTATCCCACCAAGAA                    | TCCCCAGAGGAAATGAGATG                    |
| CHKB             | TGGTGCTAGAAAGCGTGATG                    | GCCGACTTGGGATGTACT                      |
| PCYT1A           | GCAACCAGCTCCTTTTCTG                     | GCAAACCTCCACAATGAGGT                    |
| CHPT1            | TCTGCTCTTTTATTGGGATGTTTG                | CAACACAAAGACAATCACTAAAGC                |
| PISD             | ATCACTACCGCAACCTCAGCGA                  | TACCTGCTCCACCTCACAGTC                   |
| SMS 1            | GCACTTTCCTGTTTCGTTCTC                   | TACAGCGTGCCAACTATGC                     |
| SMS 2            | GCATTTCCAGTGTGCTCCAAAGC                 | GTAACCGTGTGACCGCTGAAGA                  |

**Table 2.** Analysis of correlations between the <sup>1</sup>H-NMR signal intensities of selected groups of lipids and the levels of fatty acids, and patients BMI, serum triacylglycerols and total cholesterol.

| Lipid/lipid group         | Correlation with BMI |       | Correlation with serum triacylglycerols |       | Correlation with serum total cholesterol |       |
|---------------------------|----------------------|-------|-----------------------------------------|-------|------------------------------------------|-------|
|                           | R                    | p     | R                                       | p     | R                                        | p     |
| Free cholesterol          | -0.101               | 0.662 | -0.116                                  | 0.588 | 0.099                                    | 0.644 |
| Phosphatidylethanolamines | 0.096                | 0.679 | -0.165                                  | 0.441 | -0.215                                   | 0.312 |
| Sphingomyelin             | -0.066               | 0.776 | -0.259                                  | 0.222 | -0.024                                   | 0.910 |
| Phosphatidylcholines      | -0.043               | 0.852 | -0.260                                  | 0.221 | -0.013                                   | 0.951 |
| Phospholipids             | -0.071               | 0.758 | -0.302                                  | 0.152 | -0.139                                   | 0.517 |
| Triacylglycerols          | -0.425               | 0.053 | -0.181                                  | 0.397 | -0.120                                   | 0.575 |
| 16:0                      | 0.063                | 0.786 | -0.218                                  | 0.306 | 0.269                                    | 0.204 |
| 18:0                      | 0.024                | 0.918 | 0.069                                   | 0.750 | -0.087                                   | 0.685 |
| Total SFA                 | -0.034               | 0.884 | -0.114                                  | 0.597 | 0.023                                    | 0.916 |
| 16:1                      | 0.118                | 0.609 | 0.121                                   | 0.574 | 0.140                                    | 0.516 |
| 18:1                      | 0.044                | 0.850 | 0.048                                   | 0.824 | -0.056                                   | 0.795 |
| Total MUFA                | 0.024                | 0.918 | 0.060                                   | 0.780 | -0.044                                   | 0.838 |
| 18:2 (LA)                 | 0.054                | 0.815 | -0.155                                  | 0.470 | 0.194                                    | 0.363 |
| 20:4 (ARA)                | -0.030               | 0.899 | 0.046                                   | 0.831 | -0.012                                   | 0.955 |
| Total n-6 PUFA            | -0.028               | 0.903 | -0.005                                  | 0.982 | 0.053                                    | 0.806 |
| 18:3 (ALA)                | -0.127               | 0.583 | -0.124                                  | 0.563 | -0.350                                   | 0.093 |
| 20:5 (EPA)                | 0.208                | 0.364 | -0.246                                  | 0.247 | 0.012                                    | 0.956 |
| 22:6 (DHA)                | -0.021               | 0.928 | -0.050                                  | 0.815 | 0.096                                    | 0.655 |
| Total n-3 PUFA            | 0.079                | 0.733 | -0.109                                  | 0.612 | 0.054                                    | 0.803 |

R - Pearson's correlation coefficient, p - significance.

**Table 3.** Differences in <sup>1</sup>H-NMR signal intensity of selected lipid groups and fatty acid levels in tumor tissue in various groups of CRC patients.

| Lipid/lipid group                      | CRC patients with<br>T stage 1 and 2<br>Mean ± SEM | CRC patients<br>with<br>T stage 3 and 4<br>Mean ± SEM | p     | Male CRC<br>patients<br>Mean ± SEM | Female CRC<br>patients<br>Mean ± SEM | p     |
|----------------------------------------|----------------------------------------------------|-------------------------------------------------------|-------|------------------------------------|--------------------------------------|-------|
| Free cholesterol <sup>a</sup>          | 163 ± 19.1                                         | 140 ± 20.4                                            | 0.437 | 130 ± 16.4                         | 186 ± 22.4                           | 0.053 |
| Phosphatidylethanolamines <sup>a</sup> | 31.9 ± 6.20                                        | 23.6 ± 5.07                                           | 0.309 | 23.9 ± 19.1                        | 33.3 ± 6.81                          | 0.259 |
| Sphingomyelin <sup>a</sup>             | 181 ± 15.5                                         | 146 ± 19.8                                            | 0.201 | 150 ± 16.9                         | 181 ± 20.9                           | 0.271 |
| Phosphatidylcholines <sup>a</sup>      | 563 ± 47.9                                         | 443 ± 60.3                                            | 0.149 | 461 ± 50.0                         | 557 ± 69.6                           | 0.272 |
| Phospholipids <sup>a</sup>             | 81.1 ± 10.5                                        | 63.2 ± 10.2                                           | 0.240 | 64.6 ± 9.21                        | 82.7 ± 12.3                          | 0.251 |
| Triacylglycerols <sup>a</sup>          | 45.3 ± 9.72                                        | 38.6 ± 8.01                                           | 0.603 | 40.6 ± 6.56                        | 43.4 ± 12.8                          | 0.837 |
| 16:0 <sup>b</sup>                      | 21.0 ± 0.485                                       | 20.5 ± 0.429                                          | 0.466 | 20.5 ± 0.462                       | 21.0 ± 0.340                         | 0.486 |
| 18:0 <sup>b</sup>                      | 12.3 ± 0.825                                       | 12.7 ± 0.777                                          | 0.728 | 12.5 ± 0.656                       | 12.7 ± 1.07                          | 0.867 |
| Total SFA <sup>b</sup>                 | 36.7 ± 0.778                                       | 36.9 ± 0.722                                          | 0.857 | 36.8 ± 0.593                       | 36.9 ± 1.04                          | 0.907 |
| 16:1 <sup>b</sup>                      | 3.38 ± 0.330                                       | 3.31 ± 0.259                                          | 0.863 | 3.41 ± 0.266                       | 3.23 ± 0.313                         | 0.679 |
| 18:1 <sup>b</sup>                      | 35.4 ± 1.57                                        | 35.9 ± 1.50                                           | 0.828 | 35.8 ± 1.24                        | 35.5 ± 2.08                          | 0.896 |
| Total MUFA <sup>b</sup>                | 40.0 ± 1.81                                        | 40.7 ± 1.69                                           | 0.778 | 40.5 ± 1.46                        | 40.0 ± 2.26                          | 0.851 |
| 18:2 (LA) <sup>b</sup>                 | 12.0 ± 0.651                                       | 10.6 ± 0.453                                          | 0.087 | 11.0 ± 0.547                       | 11.6 ± 0.553                         | 0.519 |
| 20:4 (ARA) <sup>b</sup>                | 6.58 ± 0.579                                       | 6.85 ± 0.787                                          | 0.793 | 6.77 ± 0.640                       | 6.66 ± 0.847                         | 0.922 |
| Total n-6 PUFA <sup>b</sup>            | 21.0 ± 1.05                                        | 20.1 ± 1.00                                           | 0.542 | 20.4 ± 0.930                       | 20.8 ± 1.18                          | 0.765 |
| 18:3 (ALA) <sup>b</sup>                | 0.061 ± 0.011                                      | 0.050 ± 0.008                                         | 0.424 | 0.060 ± 0.009                      | 0.046 ± 0.008                        | 0.304 |
| 20:5 (EPA) <sup>b</sup>                | 0.466 ± 0.077                                      | 0.455 ± 0.045                                         | 0.804 | 0.499 ± 0.052                      | 0.376 ± 0.062                        | 0.156 |
| 22:6 (DHA) <sup>b</sup>                | 1.00 ± 0.091                                       | 1.03 ± 0.080                                          | 0.845 | 1.00 ± 0.067                       | 1.05 ± 0.117                         | 0.678 |
| Total n-3 PUFA <sup>b</sup>            | 2.11 ± 0.190                                       | 2.10 ± 0.125                                          | 0.957 | 2.12 ± 0.126                       | 2.08 ± 0.204                         | 0.840 |
| Number of samples                      | 11                                                 | 14                                                    |       | 16                                 | 9                                    |       |

<sup>a</sup>Signal intensity from <sup>1</sup>H-NMR (relative area), <sup>b</sup>% of total fatty acid content, p -significance from two-tailed t-test.

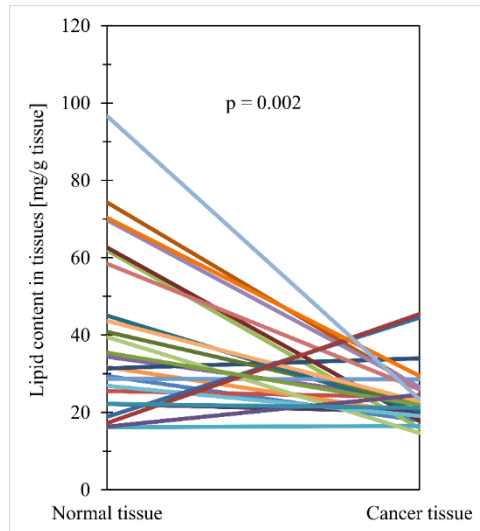

**Figure 1.** Total lipid content in normal and colorectal cancer tissue. Each line represents individual patient;  $n = 25$ .

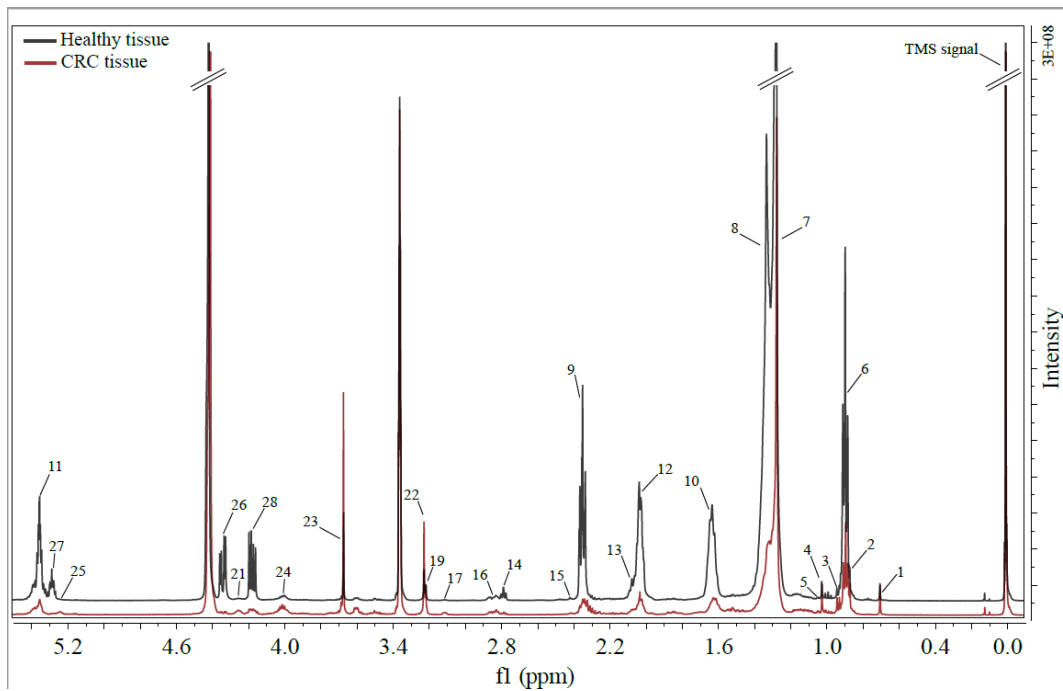

**Figure 2.** Example of a  $^1\text{H}$ -NMR spectrum for lipids isolated from healthy tissue and CRC tissue. 1 -  $\text{C}_{18}\text{H}_3$  in total cholesterol; 2 -  $\text{C}_{26}\text{H}_3/\text{C}_{27}\text{H}_3$  in total cholesterol; 3 -  $\text{C}_{21}\text{H}_3$  in free cholesterol; 4 -  $\text{C}_{19}\text{H}_3$  in free cholesterol; 5 -  $\text{C}_{19}\text{H}_3$  in esterified cholesterol; 6 -  $-\text{CH}_3$  in fatty acyl chain; 7 -  $-(\text{CH}_2)_n$  in fatty acyl chain; 8 -  $\text{CHCH}_2\text{CH}_2(\text{CH}_2)-$  in fatty acyl chain; 9 -  $-\text{CO}-\text{CH}_2-$  in fatty acyl chain; 10 -  $-\text{CO}-\text{CH}_2\text{CH}_2-$  in fatty acyl chain; 11 -  $-\text{HC}=\text{CH}-$  in fatty acyl chain; 12 -  $-\text{CH}_2\text{HC}=\text{C}$  in fatty acyl chain: 18:1; 13 -  $-\text{CH}_2\text{HC}=\text{C}$  in fatty acyl chain: 18:2n-6/20:4n-6; 14  $\text{CHCH}_2\text{CH}=\text{C}$  in fatty acyl chain: 18:2n-6; 15 -  $\text{CO}-\text{CH}_2-$  in fatty acyl chain: 22:6n-3; 16  $\text{CHCH}_2\text{CH}=\text{C}$  in fatty acyl chain: 20:4n-6/22:6n-3; 17 -  $\text{CH}_2-\text{CH}_2-\text{NH}_2$  of PE; 18  $\text{C}_2\text{H}$  in glycerol backbone of PE; 19 -  $\text{N}+(\text{CH}_3)_3$  in SM head group; 20 -  $\text{CH}_2\text{N}+(\text{CH}_3)_3$  in SM head group; 21 -  $\text{CH}_2\text{CH}_2\text{N}+(\text{CH}_3)_3$  in SM head group; 22 -  $\text{CH}_2\text{N}+(\text{CH}_3)_3$  in PC head group; 23 -  $\text{N}+(\text{CH}_3)_3$  in PC head group; 24  $>\text{C}_3\text{H}_2$  in glycerol backbone of PL; 25 -  $\text{C}_2\text{H}$  in glycerol backbone of PL; 26  $>\text{C}_1\text{H}_2/\text{C}_3\text{H}_2$  in glycerol backbone of TG; 27 -  $\text{C}_2\text{H}$  in glycerol backbone of TG; 28  $>\text{C}_1\text{H}_2/\text{C}_3\text{H}_2$  in glycerol backbone of TG and PL.

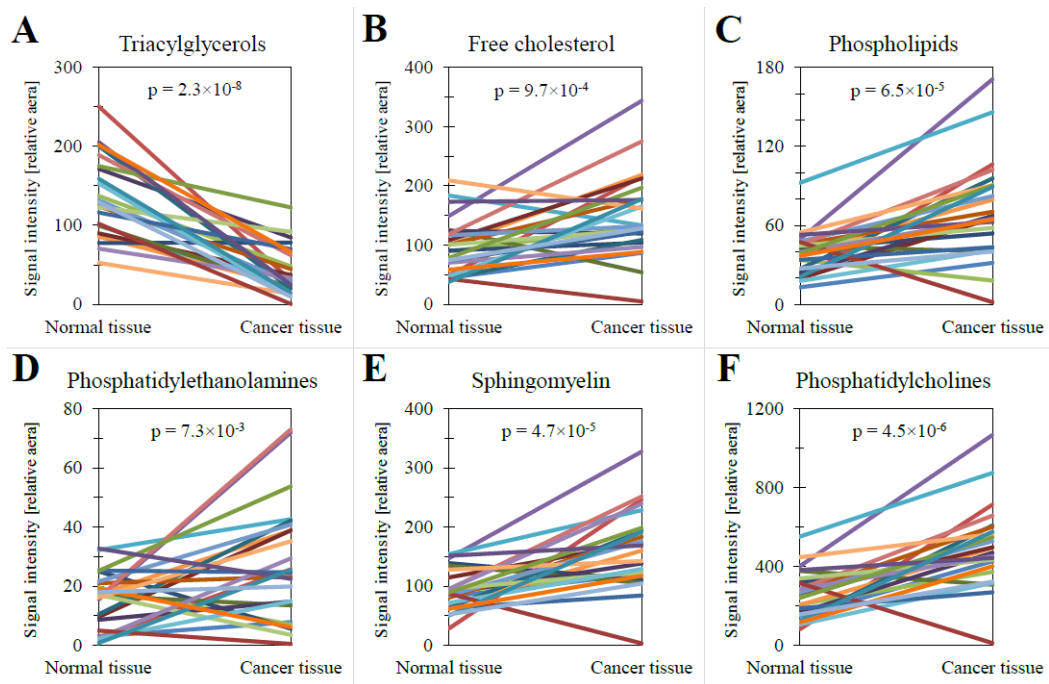

**Figure 3.** Intensities of  $^1\text{H}$ -NMR signal for selected groups of lipids: (A) triacylglycerols; (B) free cholesterol; (C) phospholipids; (D) phosphatidylethanolamines; (E) sphingomyelin; (F) phosphatidylcholines. Each line represents individual patient;  $n=25$ .
